# Supplementary material
Source: PubMed Central journal article supplement (PMC7658640)

Supplementary Figure 1

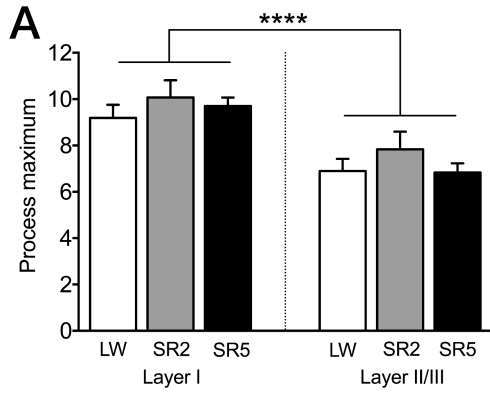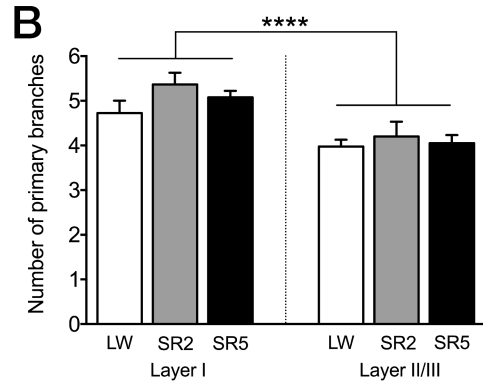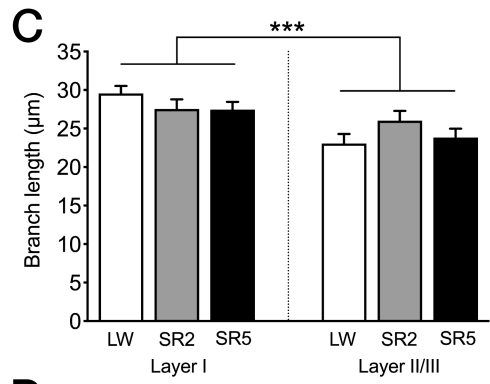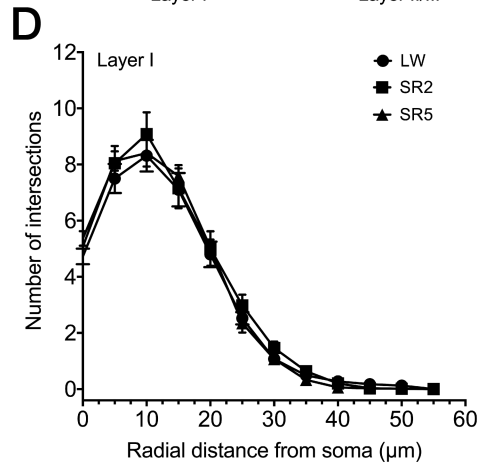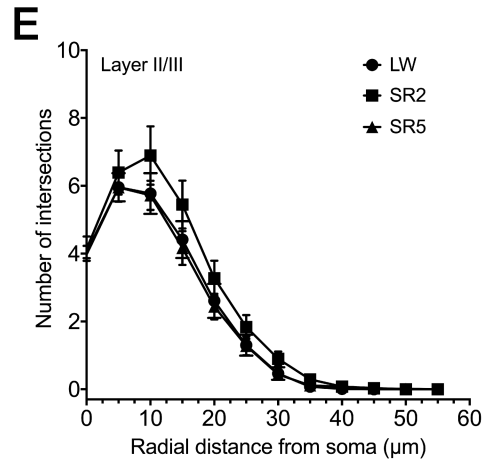

Supplementary Figure 2

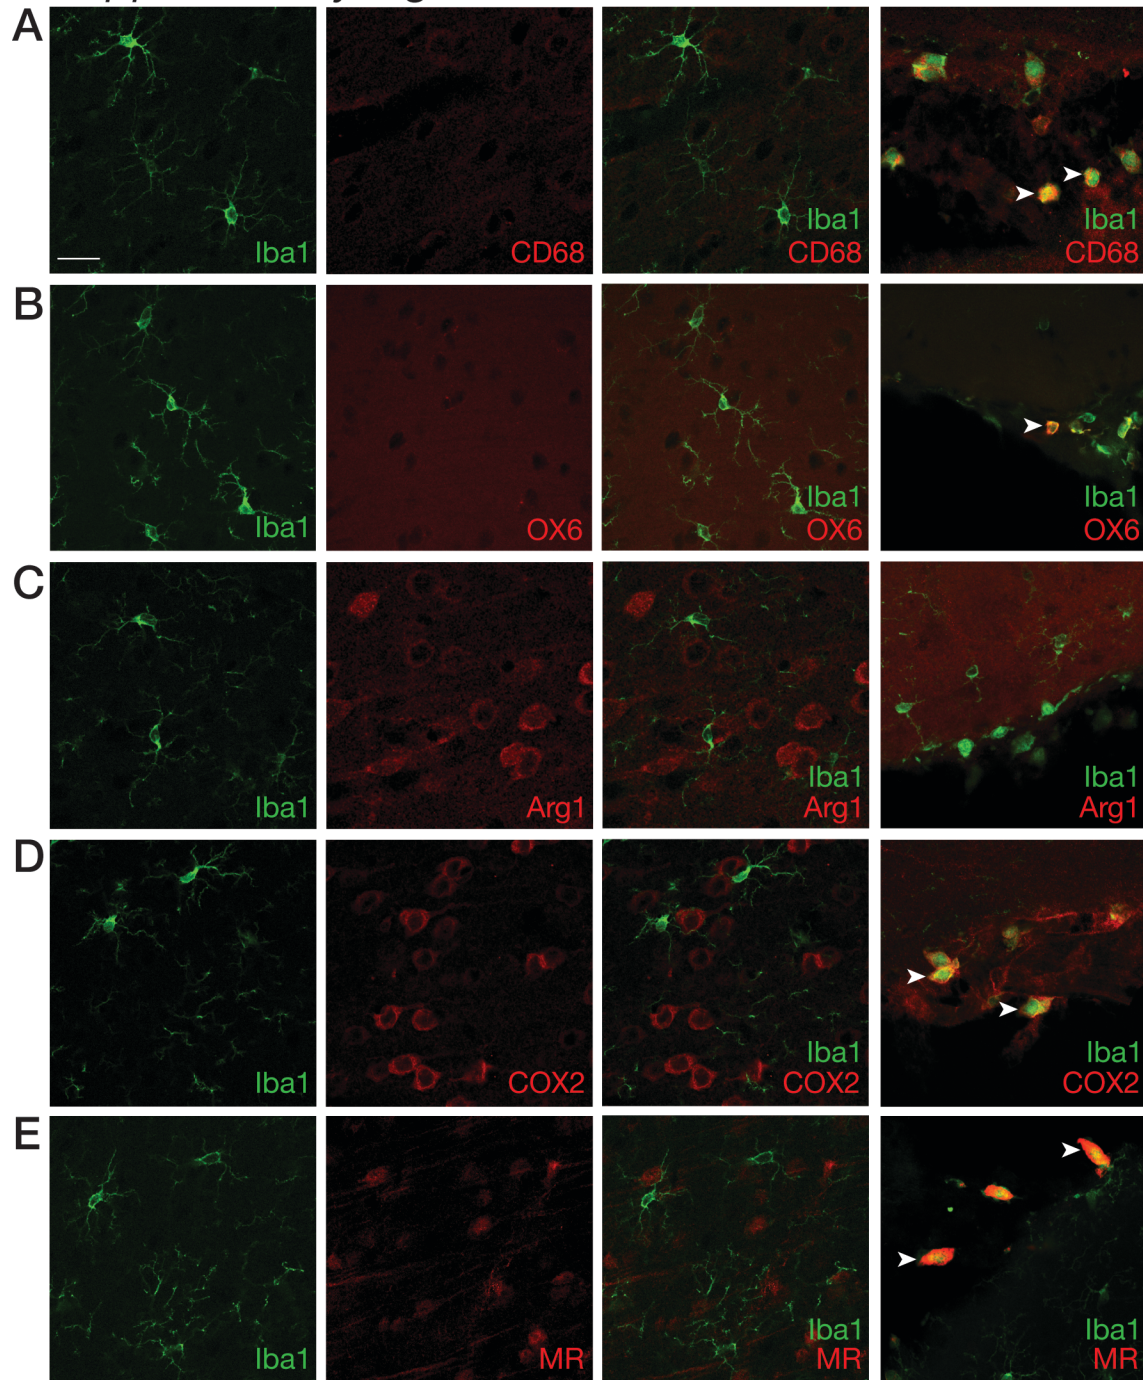

Supplement: zsaa108_suppl_supplementary_figures.pdf [file zsaa108_suppl_supplementary_figures.pdf]
